# Supplementary material for: Stable ion study of benzo[a]pyrene (BaP) derivatives: 7,8-dihydro-BaP, 9,10-dihydro-BaP and its 6-halo derivatives, 1- and 3-methoxy-9,10-dihydro- BaP-7(8H)-one, as well as the proximate carcinogen BaP 7,8-dihydrodiol and its dibenzoate, combined with a comparative DNA binding study of regioisomeric (1-, 4-, 2-) pyrenylcarbinolsElectronic supplementary information (ESI) available: Selected NMR spectra (Fig. S1 and Charts S1-S10) and DFT computed energies for carbocations (Table S1). See http://www.rsc.org/suppdata/ob/b2/b212412b/
Source: Royal Society of Chemistry journal article supplement (doi:10.1039/b212412b), 2003-04-04
Supplement: b212412b.pdf [file b212412b.pdf]

## Supporting Information

### Stable Ion Study of Benzo[a]pyrene (BaP) derivatives; 7,8-Dihydro-BaP, 9,10-Dihydro-BaP and its 6-Halo Derivatives, 1- and 3-Methoxy-9,10-Dihydro- BaP-7(8*H*)-one, as well as the Proximate Carcinogen BaP 7,8-Dihydrodiol and its Dibenzoate, Combined with a Comparative DNA Binding Study of Regioisomeric (1, 4, 2) Pyrenylcarbinols

Takao Okazaki,<sup>a</sup> Kenneth K. Laali,<sup>\*a</sup> Barbara Zajc,<sup>b,c</sup> Mahesh K. Lakshman,<sup>b</sup> Subodh Kumar,<sup>d</sup> William M. Baird,<sup>e</sup> Wan-Mohaiza Dashwood<sup>e</sup>

|                                                                                                                                                                                                                                                                                                                                                                                                                                                                                          | Page |
|------------------------------------------------------------------------------------------------------------------------------------------------------------------------------------------------------------------------------------------------------------------------------------------------------------------------------------------------------------------------------------------------------------------------------------------------------------------------------------------|------|
| <b>Figure S1.</b> NMR data for the substrates and their persistent carbocations<br>(NMR data for 1-(1-pyrenyl)ethyl cation are included for comparison)<br>{superscripts [a], [b], [c], [d], and [e] denote interchangeable assignments.<br>nd: not detected}                                                                                                                                                                                                                            | S2-3 |
| <b>Chart S1.</b> <sup>1</sup> H NMR spectrum for the protonation of <b>1</b> .                                                                                                                                                                                                                                                                                                                                                                                                           | S4   |
| <b>Chart S2.</b> <sup>13</sup> C NMR spectrum for the protonation of <b>1</b> .                                                                                                                                                                                                                                                                                                                                                                                                          | S5   |
| <b>Chart S3.</b> HETCOR chart for the protonation of <b>1</b> .                                                                                                                                                                                                                                                                                                                                                                                                                          | S6   |
| <b>Chart S4.</b> H/H COSY chart for the protonation of <b>1</b> .                                                                                                                                                                                                                                                                                                                                                                                                                        | S7   |
| <b>Chart S5.</b> <sup>1</sup> H NMR spectrum for the protonation of <b>6</b> .<br>Origin of the broad-hump around 12 ppm in the <sup>1</sup> H NMR spectrum of <b>6H<sub>2</sub><sup>2+</sup></b> is uncertain; it exhibited temperature dependency and was significantly broader than the FSO <sub>3</sub> H peak. This peak was not observed in the case of <b>7H<sub>2</sub><sup>2+</sup></b> (see proton spectrum in Chart S8; the COH <sup>+</sup> signal at δ 14.50 is not shown). | S8   |
| <b>Chart S6.</b> <sup>13</sup> C NMR spectrum for the protonation of <b>6</b> .                                                                                                                                                                                                                                                                                                                                                                                                          | S9   |
| <b>Chart S7.</b> H/H COSY chart for the protonation of <b>6</b> .                                                                                                                                                                                                                                                                                                                                                                                                                        | S10  |
| <b>Chart S8.</b> <sup>1</sup> H NMR spectrum for the protonation of <b>7</b> .<br>The COH <sup>+</sup> signal at δ 14.50 is not shown.                                                                                                                                                                                                                                                                                                                                                   | S11  |
| <b>Chart S9.</b> <sup>13</sup> C NMR spectrum for the protonation of <b>7</b> .                                                                                                                                                                                                                                                                                                                                                                                                          | S12  |
| <b>Chart S10.</b> H/H COSY chart for the protonation of <b>7</b> .                                                                                                                                                                                                                                                                                                                                                                                                                       | S13  |
| <b>Table S1.</b> Electronic Energies (E), Zero Point Energies (ZPE) and Relative Energies (Δ(E+ZPE)) Obtained from DFT Calculations at the B3LYP/6-31G(d)//B3LPY/6-31G(d) level.                                                                                                                                                                                                                                                                                                         | S14  |

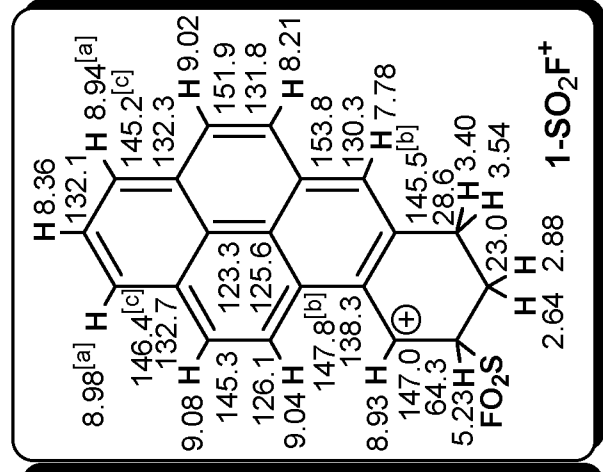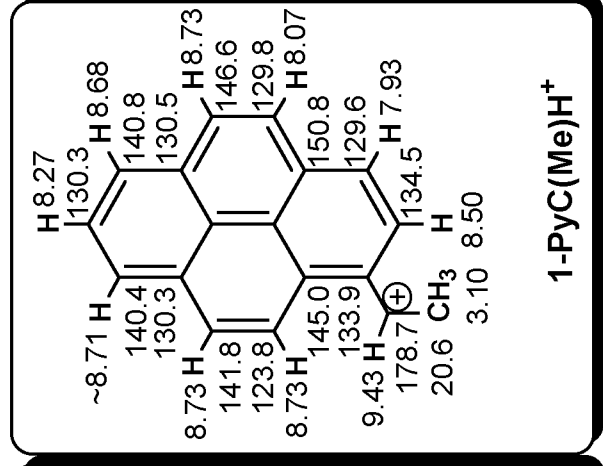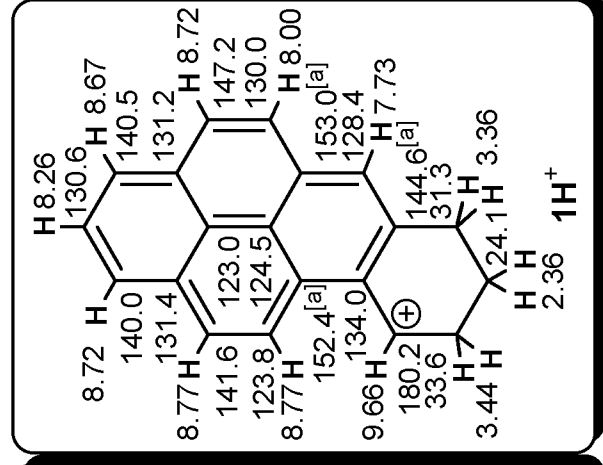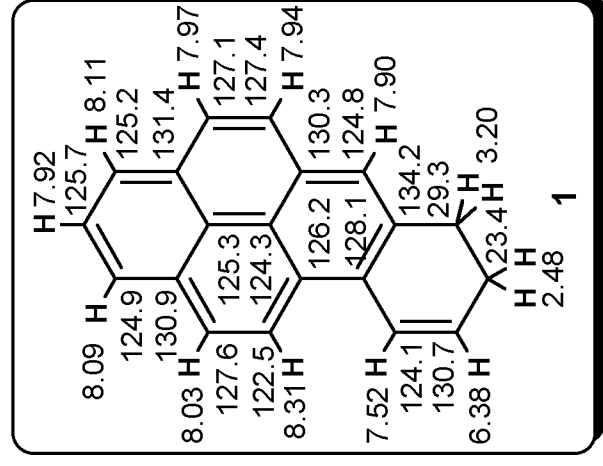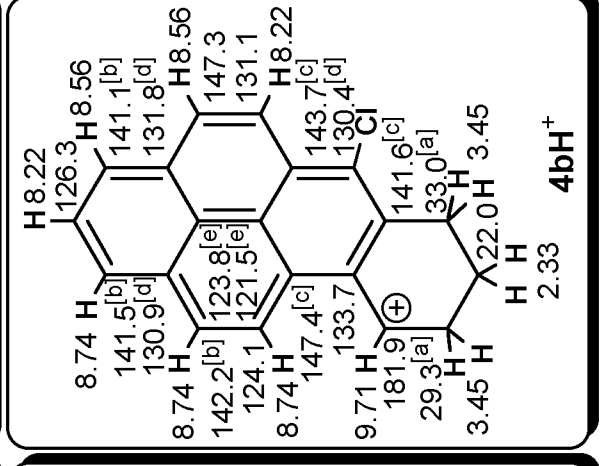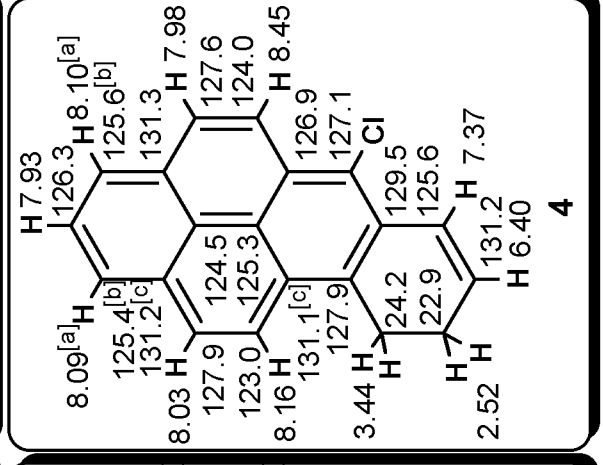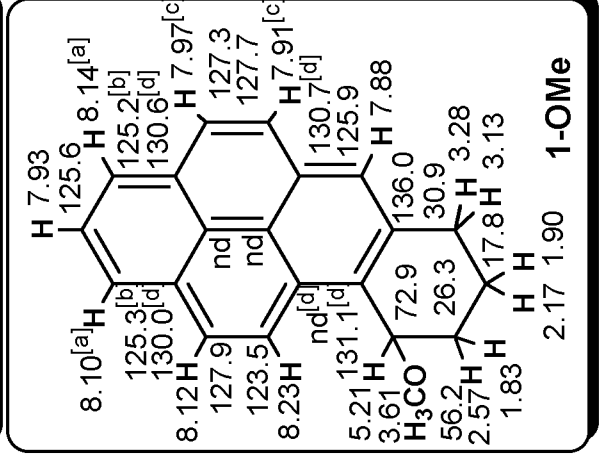

Figure S1. NMR data for the substrates and their persistent carbocations. (NMR data for 1-(1-pyrenyl)ethyl cation are included for comparison) {superscripts [a], [b], [c], [d], and [e] denote interchangeable assignments. nd: not detected}

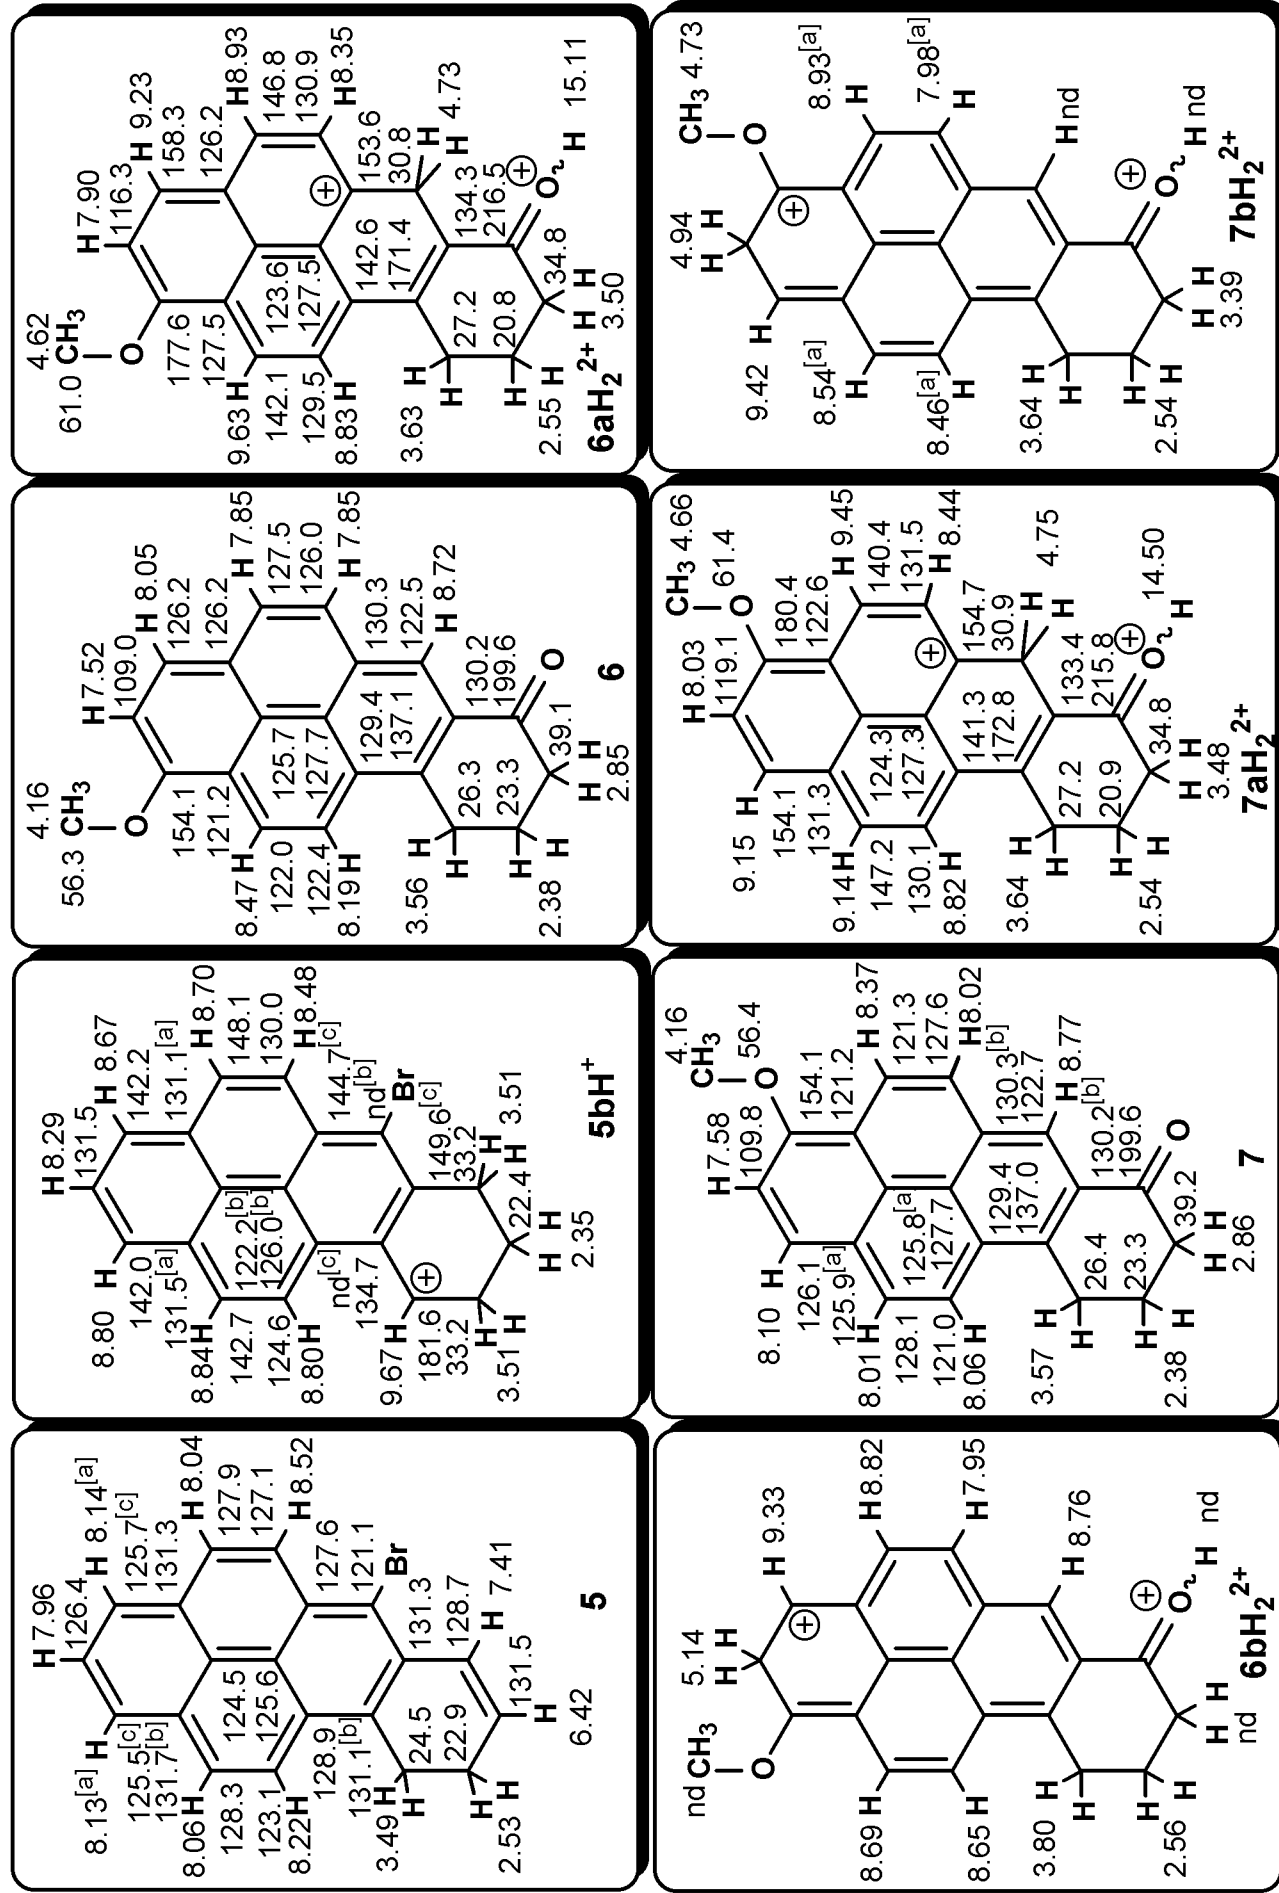

Figure S1, cont'd.

5mmsw,H\_lineshape  
spin,7-8-98  
exp9 s2pu1

date Nov 12 1999  
solvent CD2Cl2  
file /export/home/~  
laa11/okazaki102/10~  
99111201-H60-CD2Cl2  
2-5.fid  
ACQUISITION  
sfrq 499.909  
tn 499.909  
at 1.600  
np 48000  
sw 15000.5  
fb 8000  
bs 55  
tpwr 12.0  
pw 1.000  
d1 363.1  
tof 16  
nt 16  
ct 16  
alock not used  
gain not used  
PROCCESSING  
l1 n  
in n  
dp n  
hs nm  
sp -250.3  
wp 6998.5  
vs 230  
sc 0  
wc 250  
hzmh 27.99  
ls 585.90  
rf1 7312.1  
rfp 2659.5  
th 3.000  
nm cdc ph

DEC. & VT 499.914  
dfrq dn H1  
dn 30  
dpwr 5296.2  
dm 5  
dmm C  
dmc 200  
dres 1.0  
temp -60.0  
DEC2  
dfrq2 0  
dn2 1  
dpwr2 0  
dm2 n  
dmm2 C  
dmc2 200  
dres2 1.0  
homo2 n  
wfile n  
proc n  
fn not used  
math f  
werr  
wexp  
wbs  
wnt  
wft

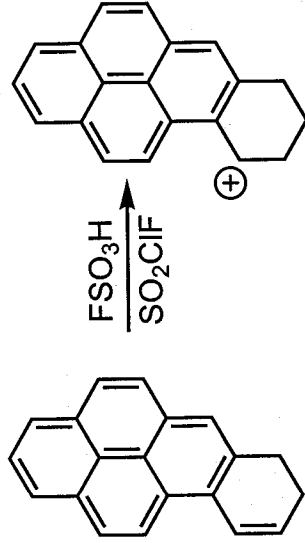

<sup>1</sup>H NMR at -60°C

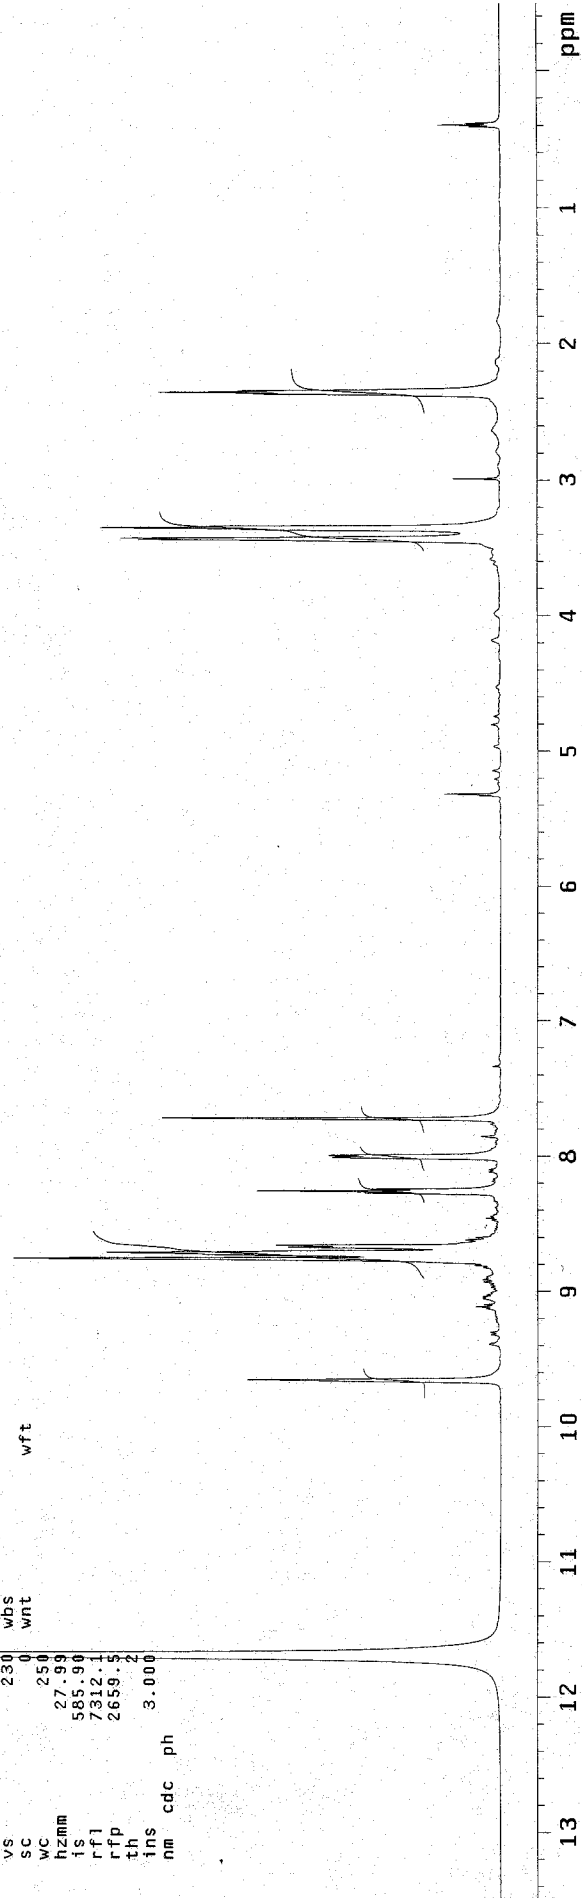

Chart S1. <sup>1</sup>H NMR spectrum for the protonation of **1**.

STANDARD CARBON PARAMETERS

```

exp8 s2pul
SAMPLE DEC. & VT
date Nov 12 1999 dfrq 499.908
solvent CD2CL2 dn H1
file /export/home/~dpwr dpwr 35
laali/okazaki02/to~ dfr 0
99111201-C60-CD2CL~ dm nvy
2-5.fid dnm 10800
ACQUISITION dmf
sfrq 125.716 dseq 1
tn 1.0 C13 dres n
at 1.066 homo n
np 106560 temp -60.0
sw 50000.0 DECE 0
fb not used dfrq2 0
bs 4 dn2 1
tpwr 52 dpr2 0
pw 11.0 dot2 0
d1 0.500 dm2 n
d2 0.500 dnm2 c
tof 2423.4 dmf2 10000
nt 10000 dseq2 1.0
ct 96 dres2 n
alock s homo2 n
gain lb PROCESSING 2.00
il n wtfile n
in n proc ft
dp y fn not used
hs nn math f
DISPLAY
sp -628.9 werr
wp 25141.5 wexp
vs 46 whs
sc 0 wnt
wc 250
hzmm 100.57
is 4250.00
rfl 17343.1
rff 6788.2
th 3
ins 1.000
nm cdc ph
  
```

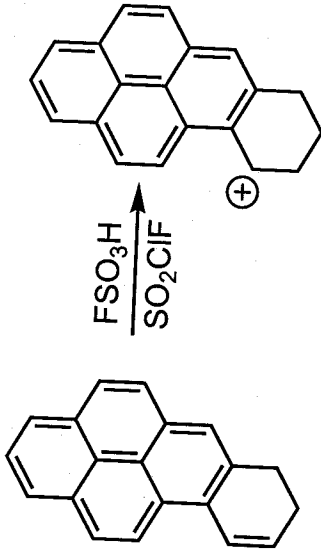

<sup>13</sup>C NMR at -60°C

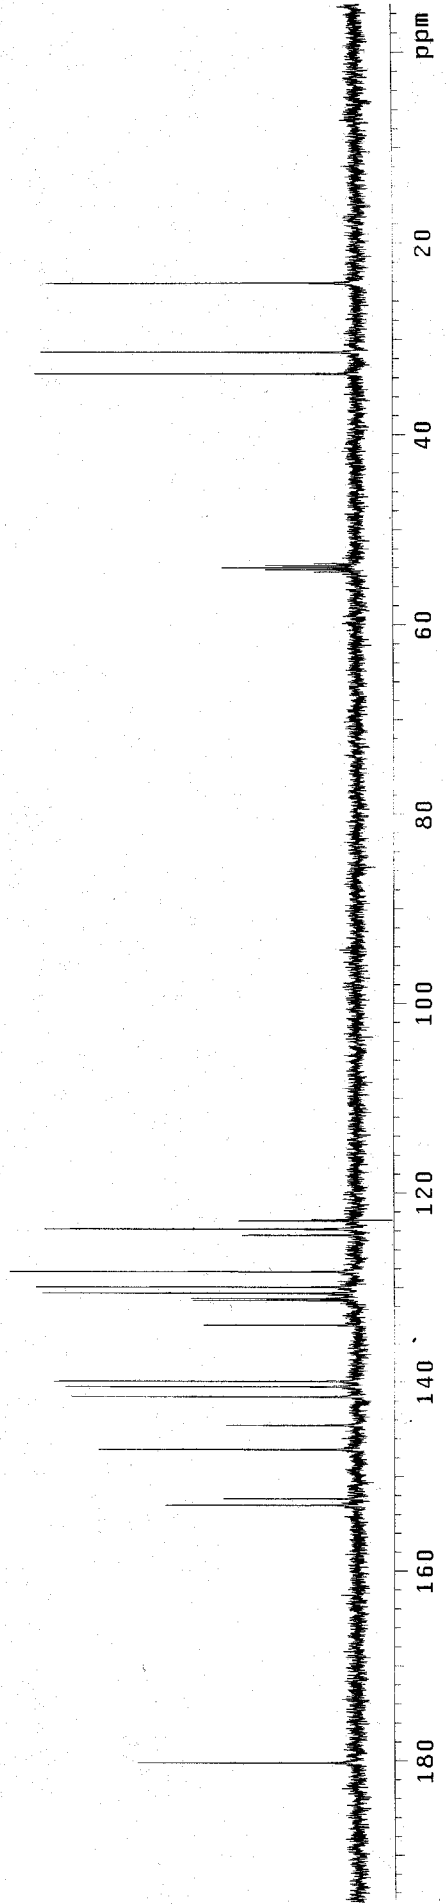

Chart S2. <sup>13</sup>C NMR spectrum for the protonation of 1.

STANDARD CARBON PARAMETERS

Pulse Sequence: hetcor

Solvent: CD2CL2

Temp: -60.0 C / 213.2 K

User: 1-14-87

File: t099111201-HETCOR-CD2CL2-5

INOVA-500 "ksu500"

PULSE SEQUENCE: hetcor

Relax. delay 0.800 sec

Acq. time 0.163 sec

Width 24509.8 Hz

2D Width 6680.0 Hz

16 repetitions

128 increments

OBSERVE C13, 125.7013210 MHZ

DECOUPLE H1, 499.9090206 MHZ

Power 35 dB

on during acquisition

off during delay

WALTZ-16 modulated

DATA PROCESSING

Sine bell 0.042 sec

F1 DATA PROCESSING

Sine bell 0.020 sec

FT size 8192 x 1024

Total time 34 min, 2 sec

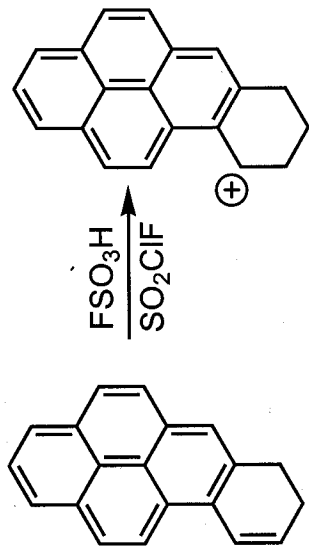

HETCOR at -60°C

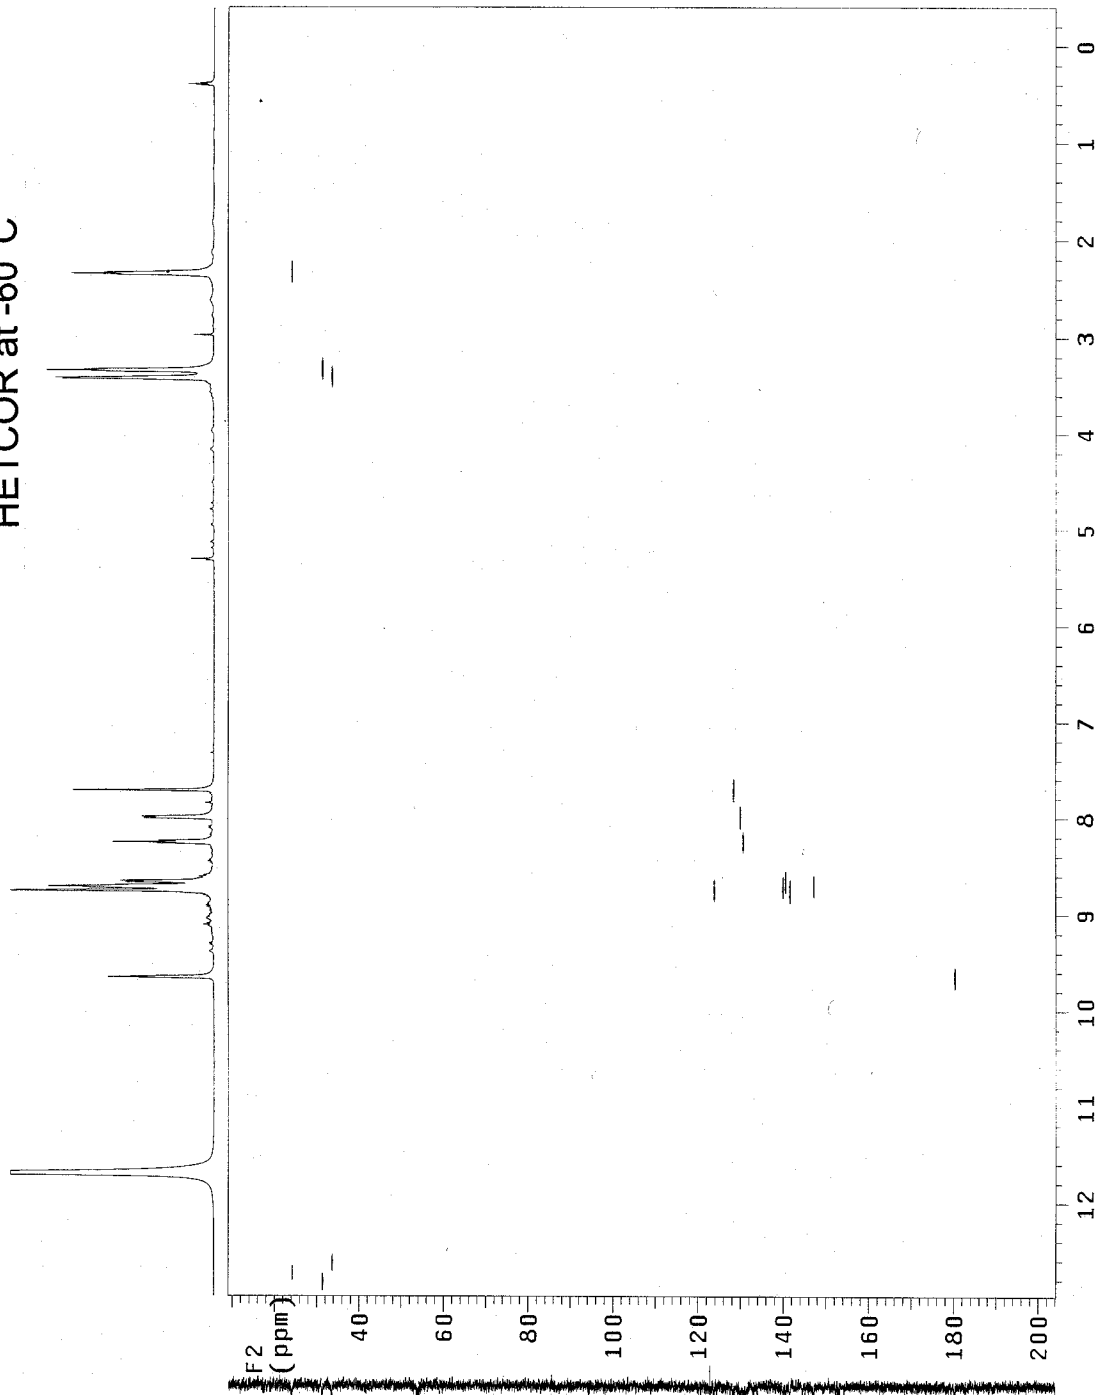

Chart S3. HETCOR chart for the protonation of 1.

okazaki/cation

Pulse Sequence: relayh

Solvent: CD2CL2  
Temp. -60.0 C / 213.2 K  
File: to99111201-COSY-CD2C12-5  
INDVA-500 "ksu500"

PULSE SEQUENCE: relayh

Relax. delay 0.400 sec

COSY 90-90

Acq. time 0.599 sec

Width 6679.5 Hz

2D Width 6679.5 Hz

4 repetitions

128 increments

OBSERVE H1, 499.9058785 MHz

DATA PROCESSING

Sine bell 0.295 sec

F1 DATA PROCESSING

Sine bell 0.009 sec

FT size 8192 x 1024

Total time 8 min, 43 sec

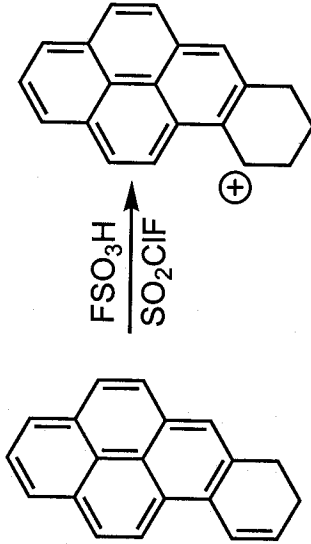

H/H COSY at -60°C

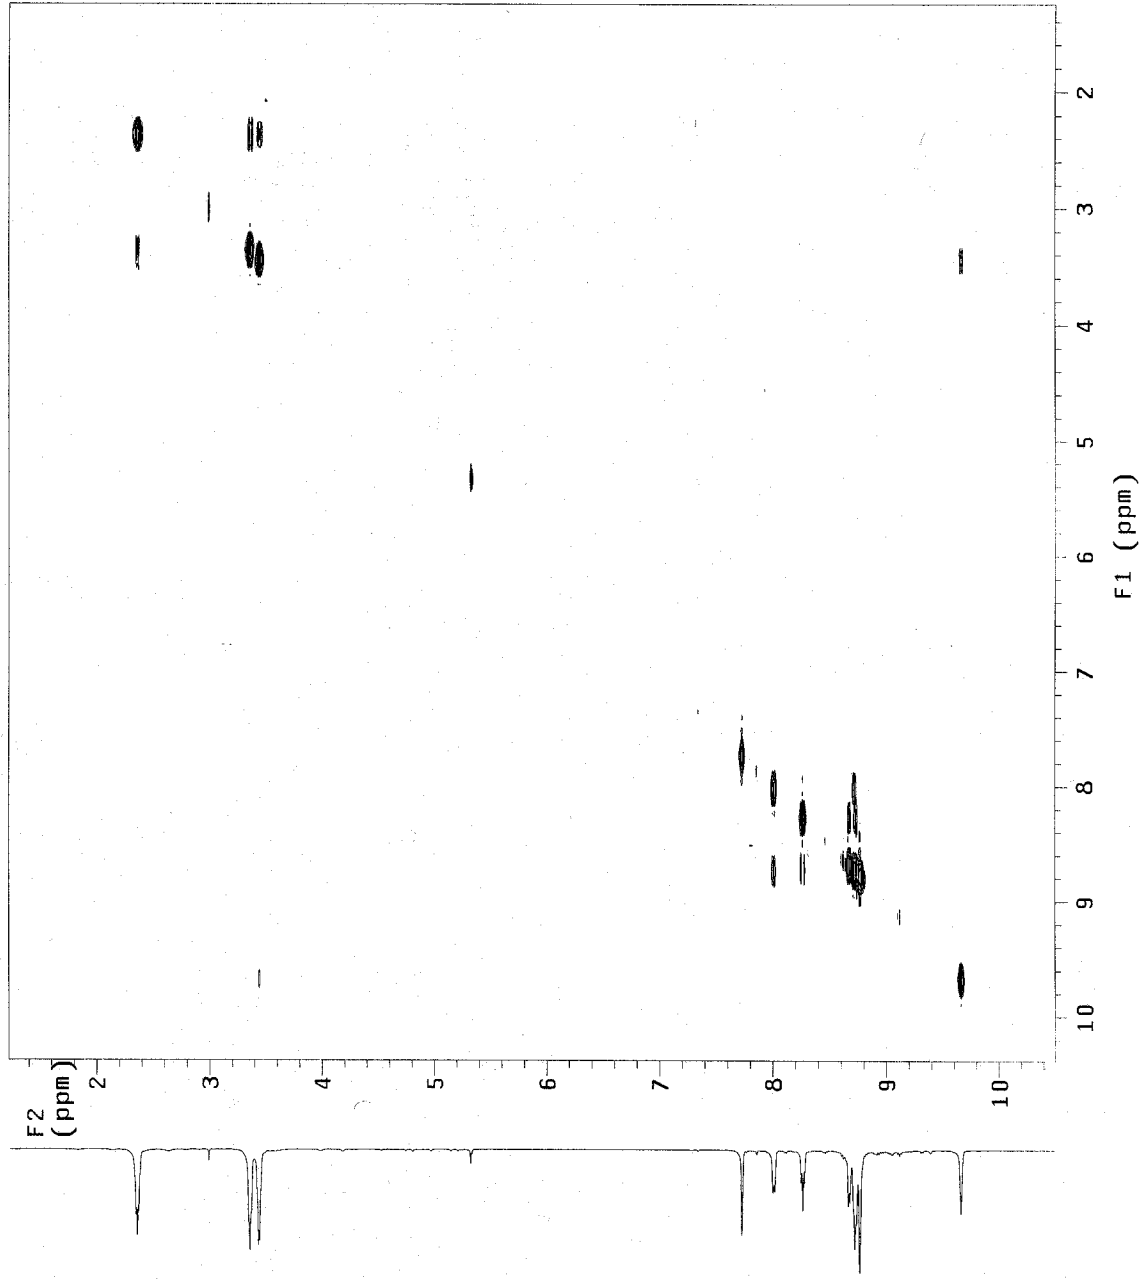

Chart S4. H/H COSY chart for the protonation of 1.

5mmsw, H lineshape  
spin, 7-8-98

exp9 s2pu1

SAMPLE DEC. & VT  
date Feb 17 2000 dfrq  
solvent CD2CL2 dn  
file /export/home/~  
laali/okazaki104/to~ dpwr 30  
00021706-H703-CD2C~ dm  
L2-5.fid dmm  
L2-5.fid dmf 200

ACQUISITION  
sfrq 499.910 dseq  
tn H1 dres  
at 1.384 homo n  
np 32000 temp  
sw 11562.4 DEC2  
fb 6000 dfrq2 0  
bs 4 dn2 1  
tpwr 55 dpwr2 1  
pw 12.0 dof2 0  
dl 1.000 dmZ n  
tof 1918.9 dmm2 c  
nt 16 dmi2 200  
ct 16 dseq2  
alock n dres2 1.0  
gain not used homo2 n

PROCESSING  
i1 n wfile  
in n proc ft  
dp y fn not used  
hs nn math f

DISPLAY  
sp -250.2 werr  
wp 6998.3 wexp  
vs 616 wbs  
sc 0 wnt  
wc 250  
hzmm 27.99  
ls 1836.26  
rf1 1380.1  
rfp 0  
th 2  
ins 1.000  
nm cdc ph

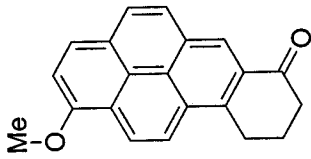

FSO<sub>3</sub>H  
SO<sub>2</sub>ClF  
→  
<sup>1</sup>H NMR at -70°C

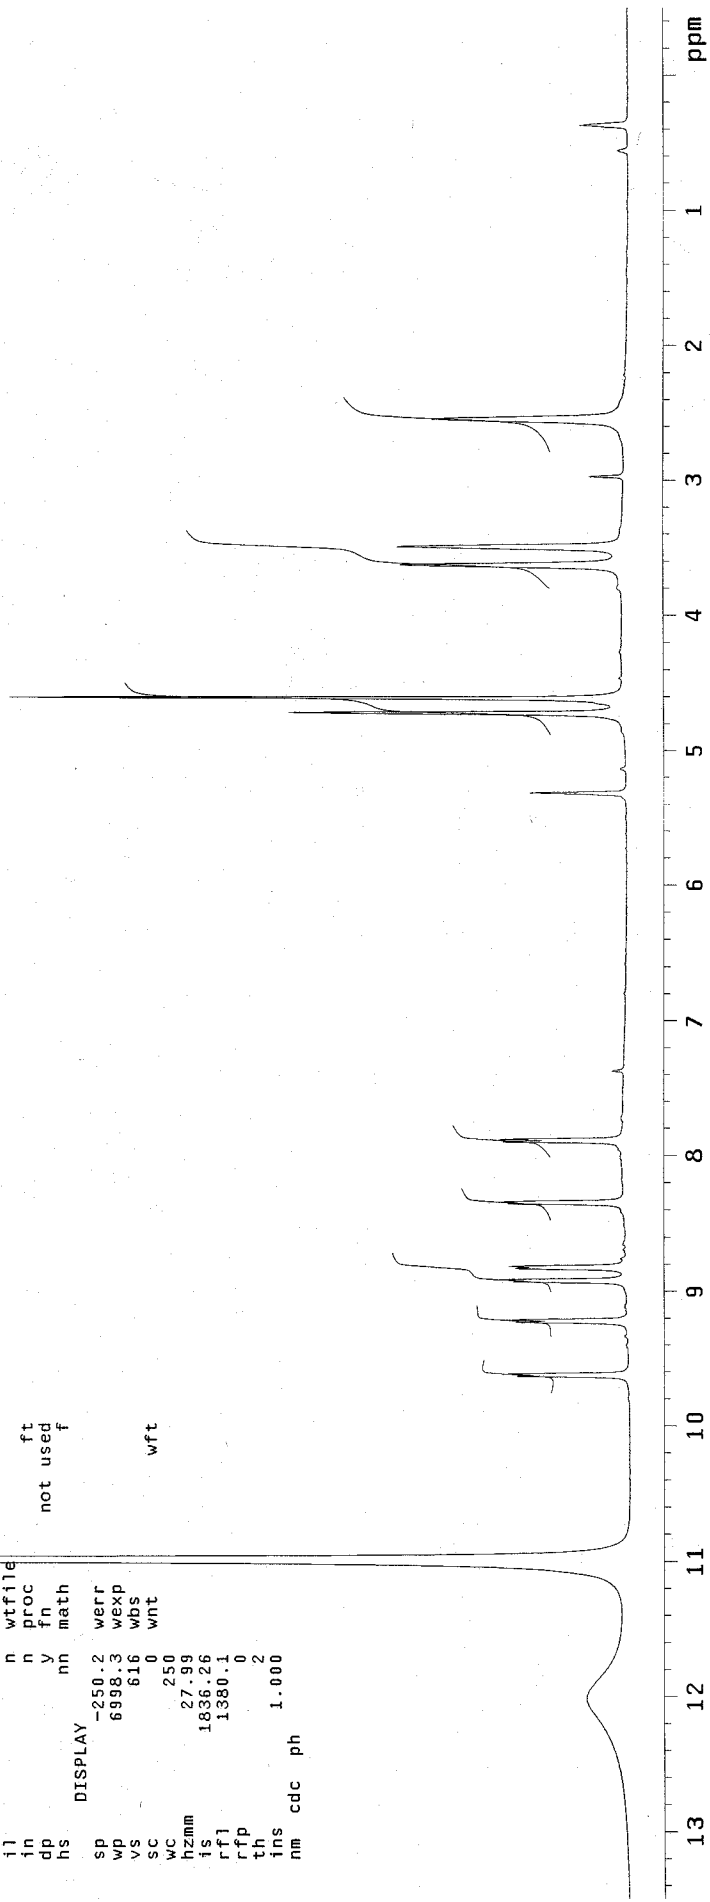

Chart S5. <sup>1</sup>H NMR spectrum for the protonation of 6.

Origin of the broad-hump around 12 ppm in the <sup>1</sup>H NMR spectrum of 6H<sub>2</sub><sup>2+</sup> is uncertain; it exhibited temperature dependency and was significantly broader than the FSO<sub>3</sub>H peak. This peak was not observed in the case of 7H<sub>2</sub><sup>2+</sup> (see proton spectrum in Chart S8; the COH<sup>+</sup> signal at d 14.50 is not shown).



STANDARD CARBON PARAMETERS

```

exp8 s2pu1
SAMPLE DEC. & VT
date Feb 17 2000 dfrq
solvent CD2CL2 dn
file /export/home/~ dpwr 35
lsali/okazaki04/to~ dof 0
00021706-C70-CD2C1~ dm nvy
2-5.fid dmm 10800
ACQUISITION: dmf 10800
sfrq 125.716 dseq
tn C13 dres 1.0
at 0.640 homo n
np 64000 temp -70.0
sw 50000.0 DEC2
fb not used dfrq2 0
bs dn2 4
tpwr 52 dpwr2 1
pw 16.0 dof2 0
d1 0.500 dmm2 n
d2 0.500 dmm2 c
tof 2423.4 dmf2 10000
nt 10000 dseq2
ct 1328 dres2 1.0
homo2 n
gain not used lb PROCESSING
flags n wtfile 1.00
in n n
dp y n proc ft
hs nn math not used f
DISPLAY
sp -629.3 werr
wp 31424.9 wexp
vs 41 wbs
sc 0 wnt
wc 250
hzmm 125.70
is 4250.00
rfl 17352.5
rff 6787.9
th 6
ins 1.000
nm cdc ph

```

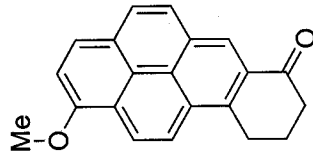

$\xrightarrow[\text{SO}_2\text{ClF}]{\text{FSO}_3\text{H}}$ 
 $^{13}\text{C NMR at } -70^\circ\text{C}$

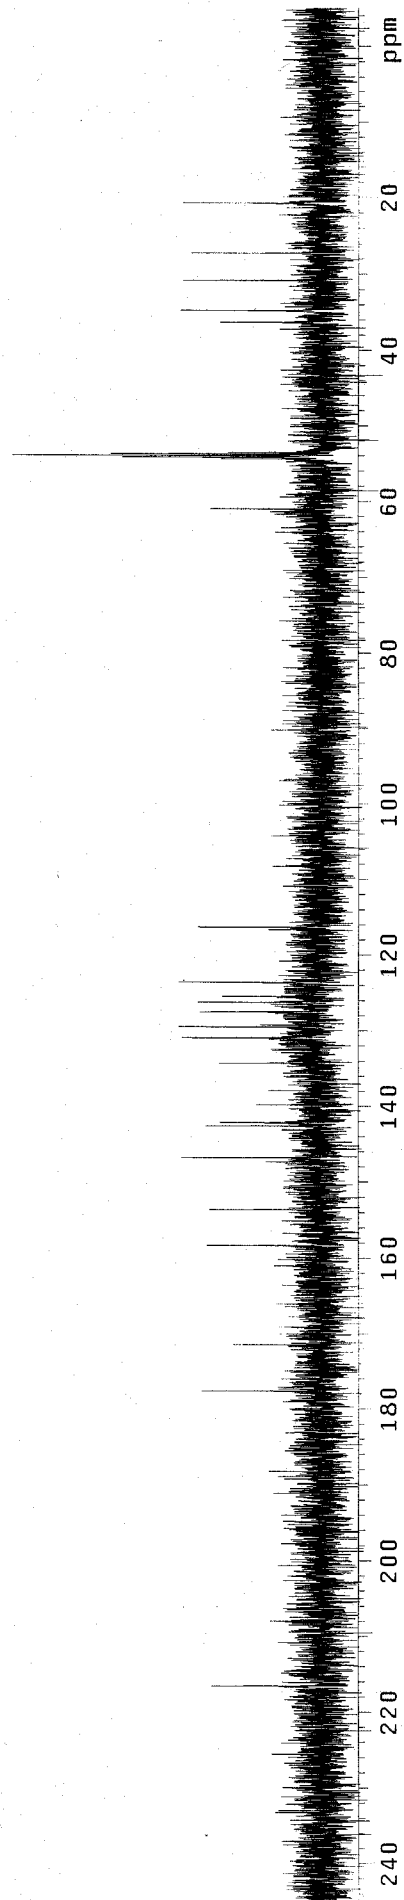

Chart S6.  $^{13}\text{C NMR}$  spectrum for the protonation of **6**.

okazaki/cation

Pulse Sequence: relayh

Solvent: CD2Cl2

Temp. -70.0 C / 203.2 K

File: to00021706-COSY70-CD2Cl2-5

INOVA-500 "ksu500"

PULSE SEQUENCE: relayh

Relax. delay 0.400 sec

COSY 90-90

Acq. time 0.449 sec

Width 4490.3 Hz

2D Width 4490.3 Hz

4 repetitions

128 increments

OBSERVE H1, 499.9058794 MHz

DATA PROCESSING

Sine bell 0.224 sec

F1 DATA PROCESSING

Sine bell 0.014 sec

FT size 4096 X 512

Total time 7 min, 28 sec

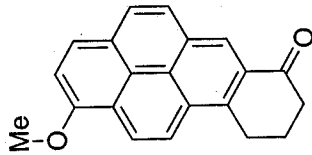

$\xrightarrow[\text{SO}_2\text{ClF}]{\text{FSO}_3\text{H}}$  H/H COSY at -70°C

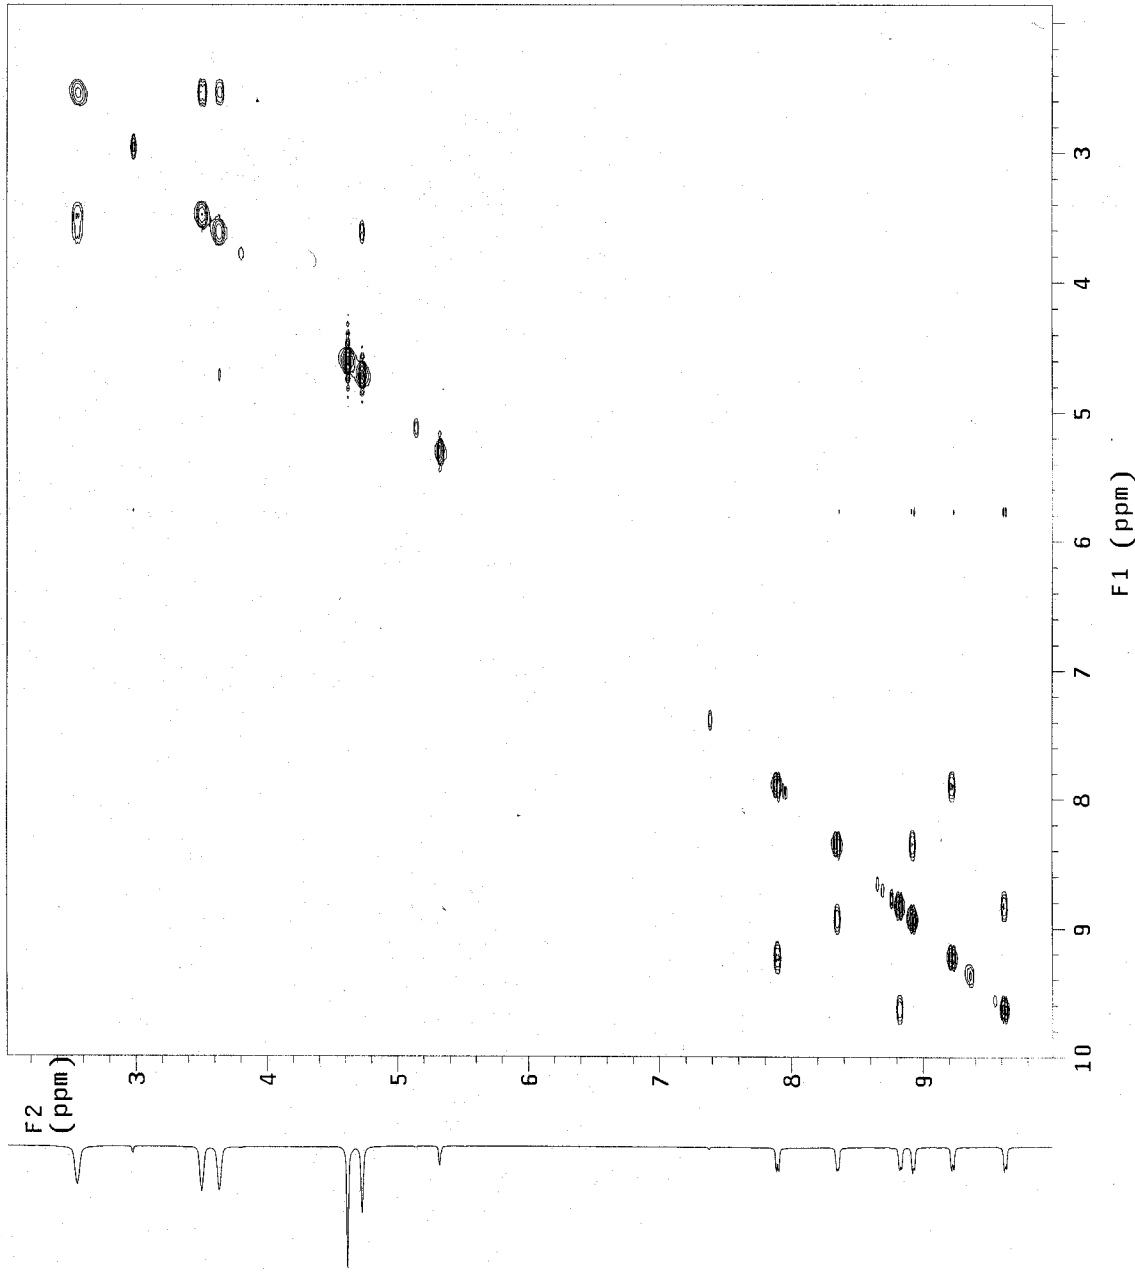

Chart S7. H/H COSY chart for the protonation of **6**.

S10

Smsw, H lineshape  
spin, 7-8-98  
exp9 s2pul

date Feb 18 2000  
solvent C02CL2  
file /export/home/...  
00021802-H70-CD2Cl2

DEC. & VT  
dfrq 499.910  
dn H1  
dpwr 30  
dof 1343.5  
dm n  
dmm c  
dseq 200

ACQUISITION  
sfrq 499.910  
tn H1  
at 1.384  
np 32000  
sw 11562.4  
fb 8000

dresq  
homo n  
temp -70.0  
DEC2  
dfrq2 0  
dn2 4  
tpwr 55  
pw 0  
dl 12.0  
tof 1918.8

dm2 n  
dmm2 c  
nt 18  
ct 16  
dseq2 200  
alock n  
gain 1.0

homo2 n  
PROCESSING  
il n  
in n  
dp n  
hs n

wtfile  
proc ft  
fn not used  
math f

DISPLAY  
sp -250.0  
wp 6498.6  
vs 2116  
sc 250  
wc 250

hzmm  
is 2236.99  
rfl 4042.9  
rffp 2659.5  
th 2  
ins 1.000  
nm cdc ph

wft

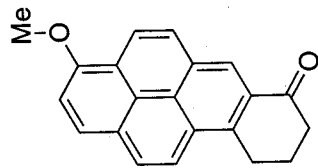

FSO<sub>3</sub>H  
SO<sub>2</sub>ClF  
→  
<sup>1</sup>H NMR at -70°C

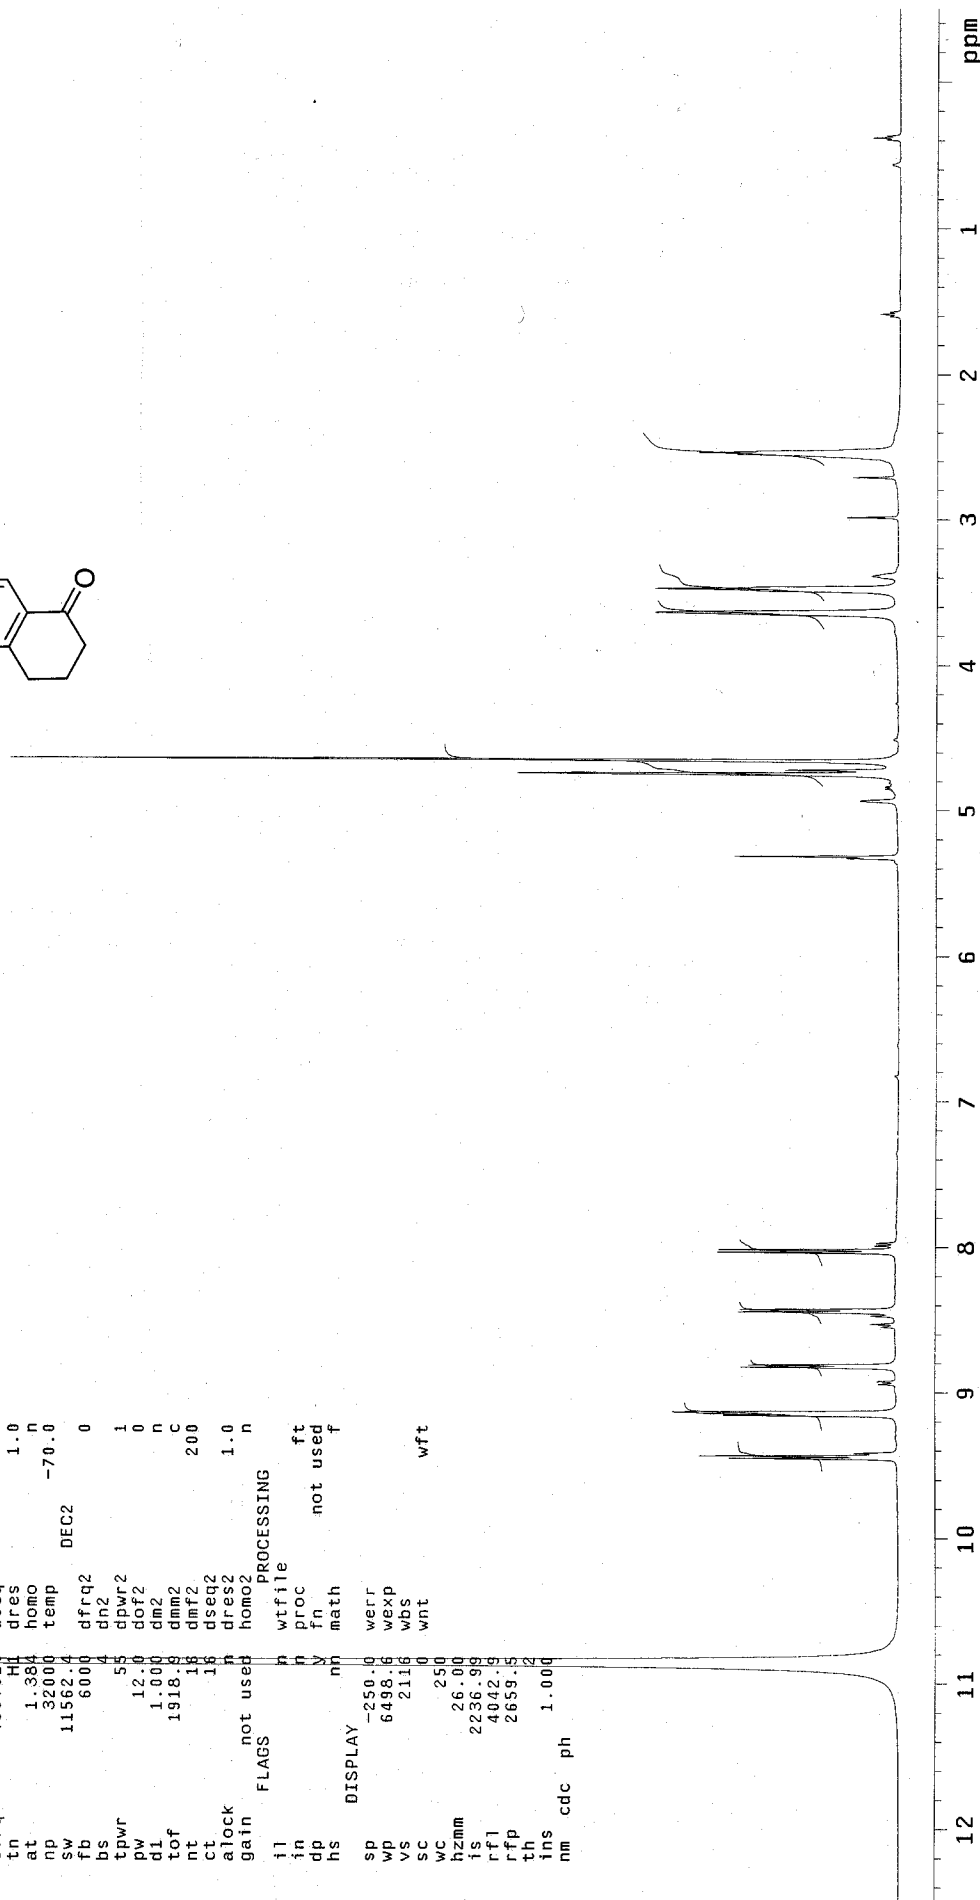

Chart S8. <sup>1</sup>H NMR spectrum for the protonation of 7.

The COH<sup>+</sup> signal at δ 14.50 is not shown.

STANDARD CARBON PARAMETERS

```

exp8  szpul
SAMPLE
date Feb 18 2000 dfrq DEC. & VT 499.908
solvent CD2CL2 dn HI 35
file /export/home/~dpwr dpwr 0
laali/okazaki04/to~ dof 0
00021802-C70-CD2CL~ dm nvy w
2-5.fid dnm 10800
ACQUISITION
sfrq 125.716 dseq
tn C13 dres 1.0
at 0.640 homo n
np 64000 temp DEC2 -70.0
sw 50000.0 dfrq2 0
bs not used 4 dn2
tpwr 52 dpwr2 1
pw 16.0 dof2 0
d1 0.500 dm2 n
d2 0.500 dnm2 C
tof 2423.4 dmf2 10000
nt 10000 dseq2
ct 380 dres2 1.0
alock n homo2 n
gain not used lb PROCESSING 2.00
flags f1 n wifile
in n n
dp y n proc ft
hs nn math not used f
DISPLAY
sp -629.8 werr
wp 31424.9 wexp
vs 44 wbs
sc 0 wnt
wc 250
hzmm 125.70
ts 4250.00
rfl 17348.3
rff 6787.9
th 6
ins cdc ph 1.000
nm

```

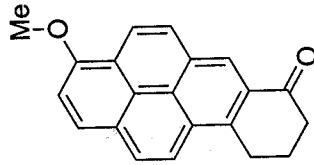

FSO<sub>3</sub>H  
SO<sub>2</sub>ClF  
→  
<sup>13</sup>C NMR at -70°C

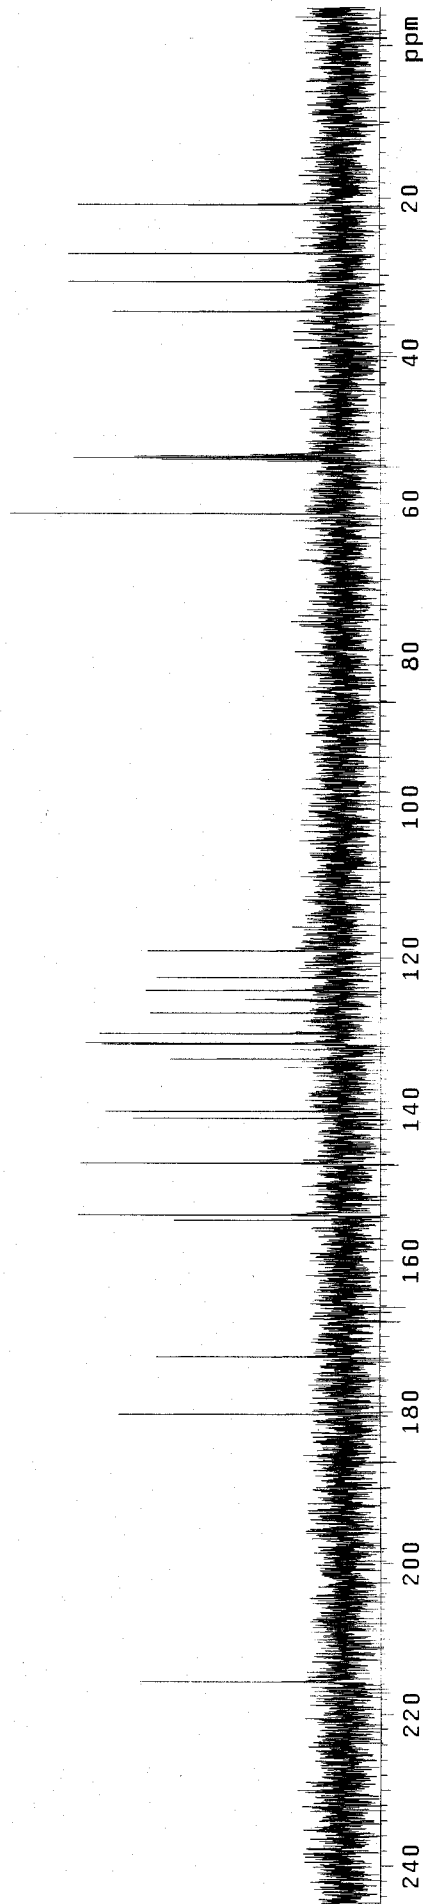

Chart S9. <sup>13</sup>C NMR spectrum for the protonation of 7.

okazaki/cation

Pulse Sequence: relayh

Solvent: CD2Cl2

Temp. -70.0 C / 203.2 K

File: t00021802-COSY70-CD2Cl2-5

INOVA-500 "ksu500"

PULSE SEQUENCE: relayh

Relax delay 0.700 sec

COSY 90-90

Acq. time 0.243 sec

Width 4216.7 Hz

2D Width 4216.7 Hz

4 repetitions

128 increments

OBSERVE H1, 499.9058840 MHz

DATA PROCESSING

Sine bell 0.116 sec

F1 DATA PROCESSING

Sine bell 0.014 sec

FT size 2048 x 512

Total time 8 min, 17 sec

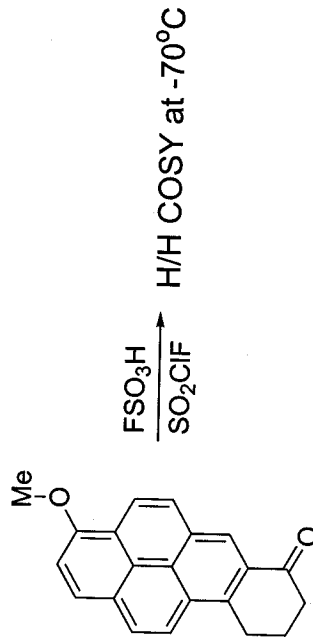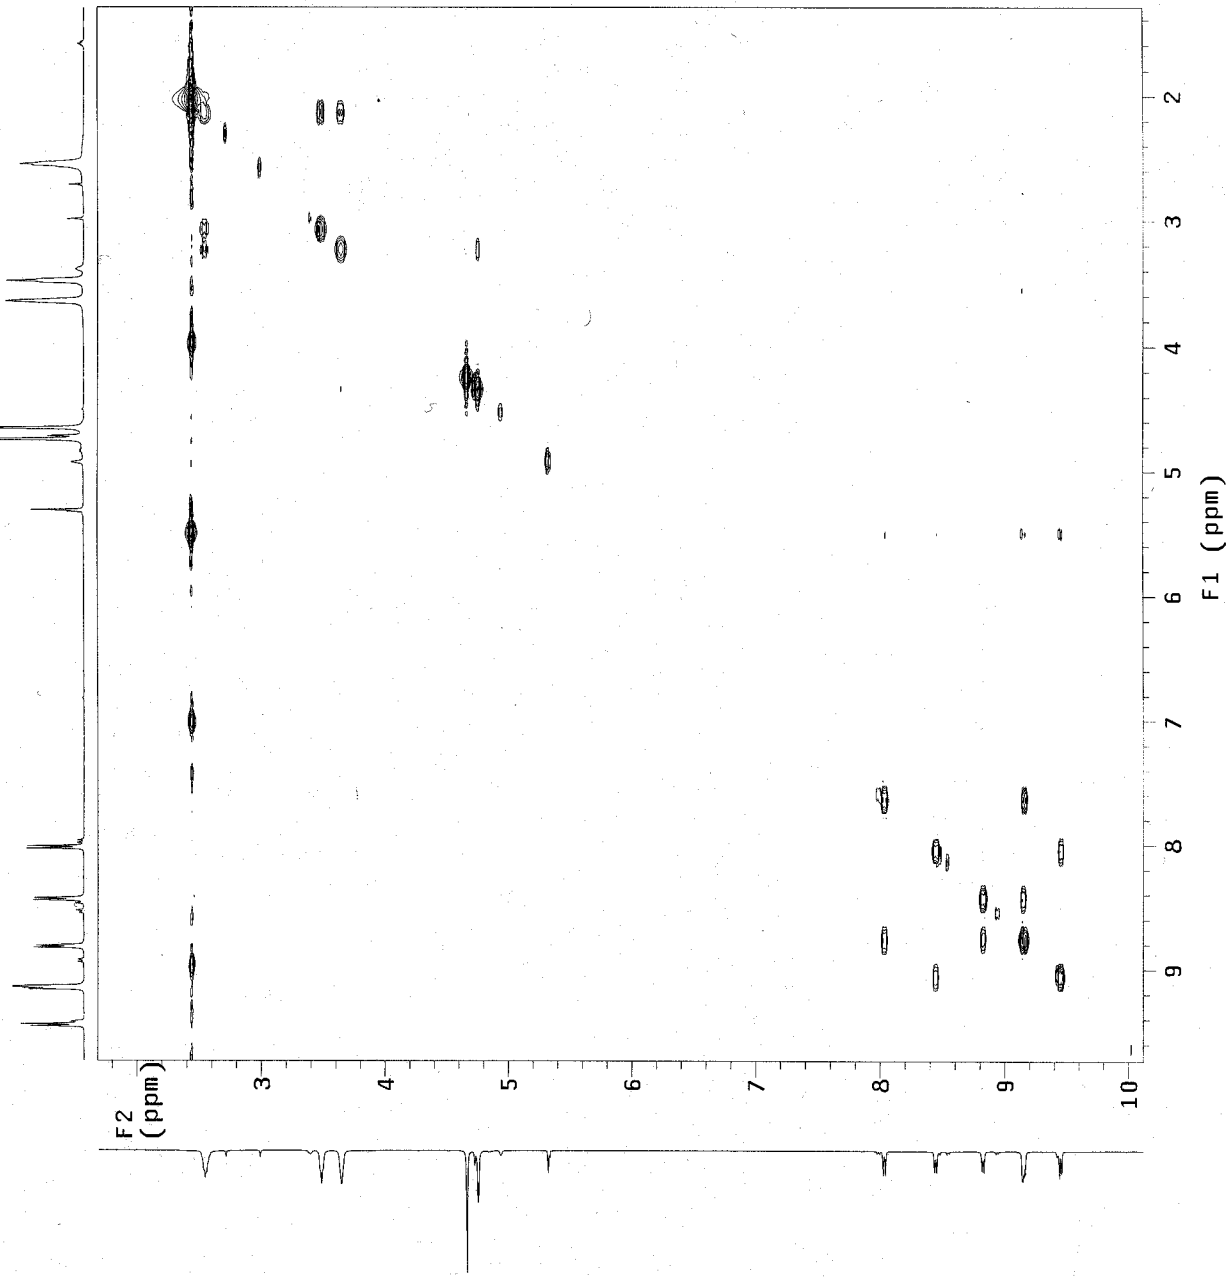

Chart S10. H/H COSY chart for the protonation of 7.

S13

**Table S1.** Electronic Energies (E), Zero Point Energies (ZPE) and Relative Energies ( $\Delta(E+ZPE)$ ) Obtained from DFT Calculations at the B3LYP/6-31G(d)//B3LYP/6-31G(d) level.

| Compd                              | E, hartree <sup>a</sup> | ZPE,<br>hartree <sup>a</sup> | E+ZPE,<br>hartree <sup>a</sup> | $\Delta(E+ZPE)$ ,<br>kcal/mol |
|------------------------------------|-------------------------|------------------------------|--------------------------------|-------------------------------|
| <b>2H<sup>+</sup></b>              | -770.9690272            | 0.289719                     | -770.679308                    |                               |
| <b>1H<sup>+</sup></b>              | -770.9850750            | 0.290139                     | -770.694936                    | -9.8 <sup>b</sup>             |
| <b>3aH<sup>+</sup></b>             | -3342.0581556           | 0.279515                     | -3341.778641                   |                               |
| <b>3bH<sup>+</sup></b>             | -3342.0757458           | 0.280124                     | -3341.795622                   | -10.7 <sup>c</sup>            |
| <b>4aH<sup>+</sup></b>             | -1230.5476092           | 0.279807                     | -1230.267802                   |                               |
| <b>4bH<sup>+</sup></b>             | -1230.5649246           | 0.280329                     | -1230.284596                   | -10.5 <sup>d</sup>            |
| <b>5aH<sup>+</sup></b>             | -870.1962905            | 0.281205                     | -869.915086                    |                               |
| <b>5bH<sup>+</sup></b>             | -870.2134295            | 0.281675                     | -869.931754                    | -10.5 <sup>e</sup>            |
| <b>6aH<sub>2</sub><sup>+</sup></b> | -960.9866305            | 0.339322                     | -960.647309                    |                               |
| <b>6bH<sub>2</sub><sup>+</sup></b> | -960.9798675            | 0.338721                     | -960.641147                    | 3.9 <sup>f</sup>              |
| <b>7aH<sub>2</sub><sup>+</sup></b> | -960.9829508            | 0.339178                     | -960.643772                    |                               |
| <b>7bH<sub>2</sub><sup>+</sup></b> | -960.9832940            | 0.338743                     | -960.644551                    | -0.5 <sup>g</sup>             |
| <b>9aH<sup>+</sup></b>             | -921.4010368            | 0.298625                     | -921.102412                    |                               |
| <b>9bH<sup>+</sup></b>             | -921.341218             | 0.294809                     | -921.046409                    | 35.1 <sup>h</sup>             |

<sup>a</sup> 1 hartree = 627.5096 kcal/mol. <sup>b</sup> Relative to **2H<sup>+</sup>**. <sup>c</sup> Relative to **3aH<sup>+</sup>**. <sup>d</sup> Relative to **4aH<sup>+</sup>**.

<sup>e</sup> Relative to **5aH<sup>+</sup>**. <sup>f</sup> Relative to **6aH<sub>2</sub><sup>+</sup>**. <sup>g</sup> Relative to **7aH<sub>2</sub><sup>+</sup>**. <sup>h</sup> Relative to **9bH<sup>+</sup>**.
